# Supplementary material for: Puerarin alleviates cisplatin-induced acute renal damage and upregulates microRNA-31-related signaling
Source: PubMed Central journal article supplement — Exp Ther Med. 2020 Jul 29;20(4):3122–9. doi: 10.3892/etm.2020.9081 (PMC7444337; doi:10.3892/etm.2020.9081), 2020-07-29

Figure S1. Transfection efficiency determination. (A) FACS results and (B) quantitative analysis showing miR-31 expression. (C) miR-31 levels detected in DDP-treated groups. Data are presented as the mean  $\pm$  standard deviation. n=3. \*P<0.05. DDP, cisplatin; NS, not significant; miR, microRNA.

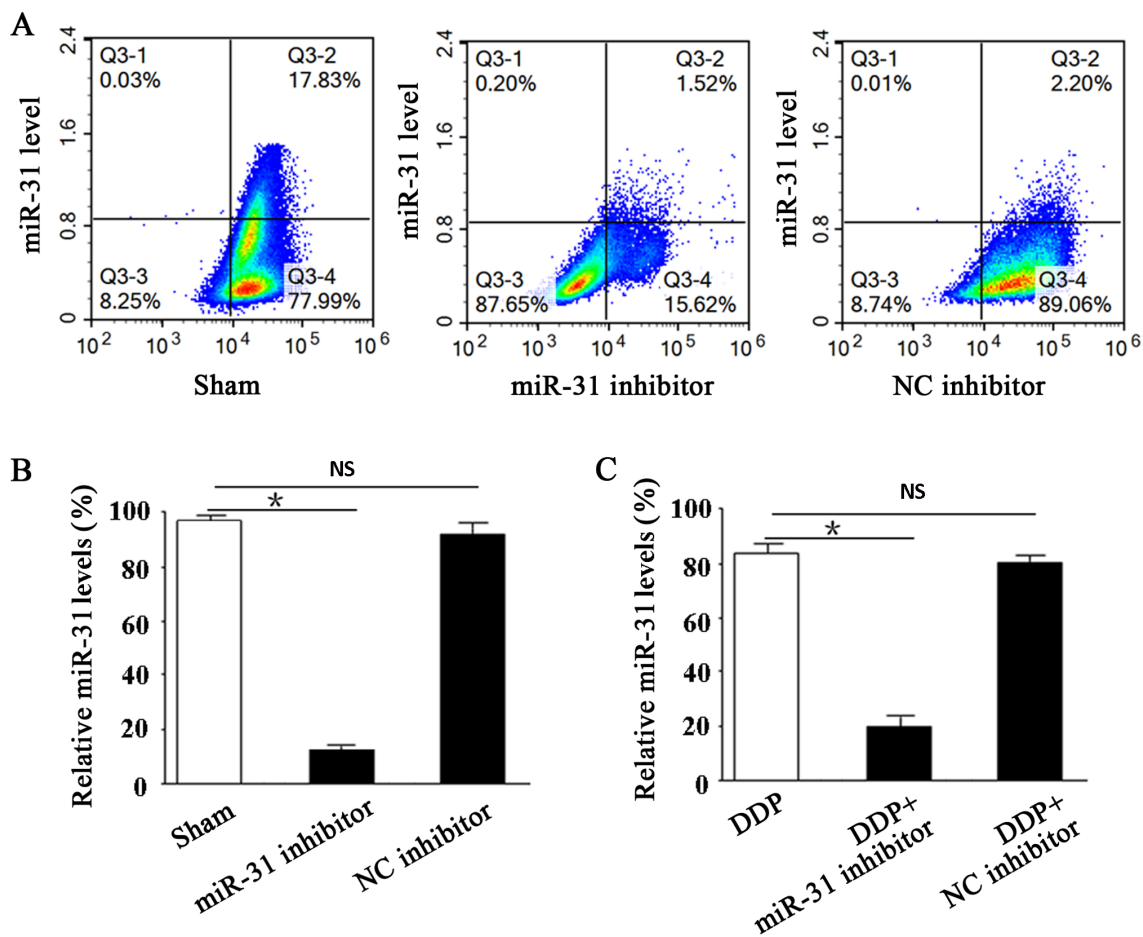

Supplement: Supplementary_Data.pdf [file Supplementary_Data.pdf]
